# Supplementary material
Source: HighWire-hosted journal article supplement (https://bmjopen.bmj.com/content/10/12/e042142)
Supplement: inline-supplementary-material-1 [file inline-supplementary-material-1.pdf]

## Appendix 1 Ideas sorted into final 6 clusters

|                                                   | Ideas # |                                                                                                                             | Ratings of importance (median) |
|---------------------------------------------------|---------|-----------------------------------------------------------------------------------------------------------------------------|--------------------------------|
| <b>1. Spiritual care as a part of health care</b> | 1.      | being an important part of general nursing                                                                                  | 3                              |
|                                                   | 2.      | being an important part of general medicine                                                                                 | 3                              |
|                                                   | 3.      | being a non-prioritized aspect in education of health professionals                                                         | 3                              |
|                                                   | 4.      | being an important aspect in palliative care                                                                                | 4                              |
|                                                   | 13.     | being interdisciplinary                                                                                                     | 3                              |
|                                                   | 27.     | Knowing when to refer to a religious or psychological or psychiatric specialist when this is warranted                      | 3                              |
|                                                   | 29.     | being an aspect of health care.                                                                                             | 4                              |
|                                                   | 34.     | Attending one of the four aspects of health, along with physical, psychological and social                                  | 3                              |
|                                                   | 43.     | being increasingly important in modern healthcare                                                                           | 3                              |
|                                                   | 59.     | A way for health professionals to attend to problems outside the reach of conventional medicine                             | 3                              |
|                                                   | 96.     | humanizing the clinic                                                                                                       | 3                              |
|                                                   | 97.     | highlighting the importance of an empathic approach to patients in health care                                              | 3                              |
|                                                   | 98.     | an insistence on taking the existential and religious thoughts, questions and dilemmas seriously in the health care context | 4                              |
|                                                   | 101.    | a curiosity about how adherence to a religious faith influences overall health                                              | 3                              |
|                                                   | 107.    | being a type of care which goes beyond bio-physical and social needs                                                        | 3                              |
|                                                   | 112.    | integrating an aesthetic dimension into health care activities                                                              | 2,5                            |
|                                                   | 118.    | an issue relevant for both nurses and doctors                                                                               | 4                              |
|                                                   | 122.    | a field that may sometimes be given second, third or even lower priority in the health care system                          | 3                              |
|                                                   | 128.    | <a href="#">an aspect of rehabilitation*</a>                                                                                | 4                              |
|                                                   | 129.    | <a href="#">an aspect of palliative care*</a>                                                                               | 4                              |
|                                                   | 148.    | being part of health care in general                                                                                        | 4                              |
|                                                   | 151.    | being part of patient empowerment                                                                                           | 3                              |
|                                                   | 152.    | being an area of growing focus national and international                                                                   | 3                              |
| Total n=24                                        | 175.    | Being health promoting especially related to mental health                                                                  | 3                              |
| <b>2. Perceived significance</b>                  | 5.      | <a href="#">being important for many critically ill patients but not all*</a>                                               | 3                              |
|                                                   | 6.      | <a href="#">being an individual care*</a>                                                                                   | 3                              |
|                                                   | 7.      | being a non-prioritized aspect of health care                                                                               | 3                              |
|                                                   | 42.     | being underprioritized in a materialism-oriented healthcare system                                                          | 3                              |
|                                                   | 44.     | being something we do not know enough about.                                                                                | 3                              |
|                                                   | 57.     | being important for patients, relatives, caregivers and administrators alike.                                               | 3                              |
|                                                   | 80.     | Continuous and life-long learning of the professional                                                                       | 3                              |
|                                                   | 82.     | The ultimate patient-centered therapeutic activity                                                                          | 3                              |
|                                                   | 85.     | Using reflective practice in professional groups                                                                            | 3                              |
|                                                   | 86.     | <a href="#">Using supervision with supervisor and other supervisees*</a>                                                    | 3                              |
|                                                   | 88.     | Participating in appropriate continuing professional education                                                              | 3                              |
|                                                   | 89.     | Recognizing that spiritual care can play a fundamental role in the healing process                                          | 4                              |
|                                                   | 92.     | Evidence-based and further developed in qualitative research                                                                | 3                              |
|                                                   | 95.     | being of relevance in the broader context of society and public health                                                      | 3                              |
|                                                   | 106.    | an exploration of health care from the perspective of humans as requiring meaning in life                                   | 4                              |
|                                                   | 119.    | an aspect of care that is not perceived relevant by all patients                                                            | 3                              |
|                                                   | 121.    | some overlap with psychology, psychiatry                                                                                    | 2                              |
|                                                   | 124.    | being difficult to many people                                                                                              | 3                              |
|                                                   | 149.    | being thought by some to be 'not my area' and 'not part of the job'                                                         | 3                              |
|                                                   | 153.    | being an area that needs more research in a secular context                                                                 | 3                              |
|                                                   | 154.    | being an area of unknown potential                                                                                          | 3                              |
|                                                   | 155.    | being a difficult area to approach in a multicultural and pluralistic context                                               | 3                              |

|                                    |      |                                                                                                                                                             |     |
|------------------------------------|------|-------------------------------------------------------------------------------------------------------------------------------------------------------------|-----|
|                                    | 156. | that it is difficult to approach the religious aspect actively in psychiatry                                                                                | 3   |
|                                    | 157. | being in need of a definition or consensus in DK context                                                                                                    | 3   |
|                                    | 158. | being a field relevant and present in many other areas than health                                                                                          | 2   |
|                                    | 161. | being something that involves all parties not 'just' the patient, relatives and health professionals                                                        | 3   |
| Total n=27                         | 179. | Being a central part of a holistic approach                                                                                                                 | 4   |
| <b>3. The role of spirituality</b> | 11.  | involving relatives                                                                                                                                         | 3   |
|                                    | 22.  | Engaging issues of faith / spirituality when relevant                                                                                                       | 4   |
|                                    | 39.  | supporting patients' relatives in the process of giving birth to a new human.                                                                               | 3   |
|                                    | 41.  | being "out in the open" with the relatives, even if I have no treatment or ailment for the patients' disease.                                               | 3   |
|                                    | 45.  | Chaplains' support of patients and relatives                                                                                                                | 3   |
|                                    | 52.  | taking care of the spirit of the patient                                                                                                                    | 4   |
|                                    | 53.  | taking care of the spirit of the relatives                                                                                                                  | 3   |
|                                    | 54.  | taking care of the spirit of the caregivers                                                                                                                 | 3   |
|                                    | 69.  | Taking care of body and soul of the client, including offering the possibility of prayer                                                                    | 3   |
|                                    | 72.  | Regular assessment of spiritual and existential concerns of the client                                                                                      | 4   |
|                                    | 74.  | Emphasizing the seamless connections between mind and body                                                                                                  | 3   |
|                                    | 83.  | Empowering the patient                                                                                                                                      | 3   |
|                                    | 94.  | conversations between chaplain and pt/relatives providing an opportunity to see ones situation and oneself as valuable in the light of a christian theology | 3   |
|                                    | 105. | an attention to the "big" questions in life                                                                                                                 | 3   |
|                                    | 123. | Thoughts about why should I live any longer                                                                                                                 | 3   |
|                                    | 126. | relationship between man and God, man and Jesus, man and man                                                                                                | 3   |
|                                    | 127. | being closely related to physical and psychosocial well-being                                                                                               | 3   |
|                                    | 150. | being an essential part of being human                                                                                                                      | 3   |
|                                    | 162. | being not necessarily religious                                                                                                                             | 4   |
|                                    | 163. | having universal aspects                                                                                                                                    | 4   |
|                                    | 164. | needing to take the cultural context into consideration                                                                                                     | 3   |
|                                    | 171. | Care for the life grapple with what is fundamentally like to be a human being                                                                               | 4   |
| Total n=23                         | 173. | Responding to the human spirit                                                                                                                              | 3   |
| <b>4. Help and support</b>         | 9.   | nonverbal, relational communication                                                                                                                         | 3   |
|                                    | 12.  | always respecting the patient's choices                                                                                                                     | 3   |
|                                    | 15.  | having the time to care                                                                                                                                     | 3   |
|                                    | 25.  | Accepting there are not always quick fixes                                                                                                                  | 3   |
|                                    | 30.  | accepting any belief system my patients/their relatives/their caregivers may hold.                                                                          | 3,5 |
|                                    | 31.  | supporting my patient when subjected to a serious/worrisome diagnosis                                                                                       | 3   |
|                                    | 32.  | supporting the relatives to a patient when subjected to a serious/worrisome diagnosis                                                                       | 3   |
|                                    | 35.  | supporting patients in the process of dying.                                                                                                                | 4   |
|                                    | 36.  | supporting patients in crisis of health, meaning or existence                                                                                               | 4   |
|                                    | 37.  | supporting relatives in the process of the patient dying.                                                                                                   | 4   |
|                                    | 38.  | supporting patients in the process of giving birth to a new human.                                                                                          | 3   |
|                                    | 58.  | An honest and respectful meeting of patient and health professional                                                                                         | 4   |
|                                    | 60.  | Letting the religious values of the patient influence treatment and care                                                                                    | 3   |
|                                    | 61.  | Supporting a meaningful interpretation of the disease by the patient                                                                                        | 4   |
|                                    | 62.  | Accepting that the disease paradigms of patients may differ from that of health professionals                                                               | 4   |
|                                    | 63.  | Helping patients understand transcendental experiences during their disease progress                                                                        | 3   |
|                                    | 71.  | Helping the client to cope with the situation                                                                                                               | 4   |
|                                    | 75.  | Being impartial, accessible and available to client of all faith/belief communities                                                                         | 4   |
|                                    | 81.  | Being ready to take the spiritual history of the client alongside their medical history                                                                     | 4   |
|                                    | 84.  | Looking after your own spiritual needs in many different ways                                                                                               | 3   |
|                                    | 90.  | Helps us to find meaning and purpose in the things we value                                                                                                 | 3   |
|                                    | 93.  | Facilitates to understand and transform suffering                                                                                                           | 3   |

|                                           |      |                                                                                                                                               |   |
|-------------------------------------------|------|-----------------------------------------------------------------------------------------------------------------------------------------------|---|
|                                           | 110. | supporting the patient in unfolding life despite illness or suffering                                                                         | 4 |
|                                           | 111. | supporting the patient in finding an inner feeling of well-being                                                                              | 4 |
|                                           | 125. | care of happiness and sadness of life                                                                                                         | 3 |
|                                           | 131. | Willingness to confront death non-evasively                                                                                                   | 4 |
|                                           | 168. | offering a transformative perspective                                                                                                         | 3 |
|                                           | 172. | Care of issues related to what humans live and die for                                                                                        | 4 |
|                                           | 176. | emphasizing existential communication with patients                                                                                           | 4 |
|                                           | 177. | attention to individuals' spiritual, religious and existential needs                                                                          | 4 |
|                                           | 182. | Making time for listening to existential or religious thoughts                                                                                | 4 |
|                                           | 184. | comforting the relatives to my patient when they are afraid and sad                                                                           | 3 |
|                                           | 190. | taking the time to discuss existential or religious questions                                                                                 | 4 |
| Total n=34                                | 191. | dealing with patients' questions, challenges, struggles, concerns etc. of an existential and/or religious nature related to health situations | 4 |
| <b>5. Quality in attitude and actions</b> |      |                                                                                                                                               |   |
|                                           | 8.   | verbal communication                                                                                                                          | 3 |
|                                           | 10.  | Touching                                                                                                                                      | 2 |
|                                           | 14.  | being together with the patient                                                                                                               | 3 |
|                                           | 17.  | always respecting the patient's suffering                                                                                                     | 4 |
|                                           | 20.  | Mercy                                                                                                                                         | 3 |
|                                           | 21.  | Charity                                                                                                                                       | 3 |
|                                           |      | Obtaining basic information about the patient's background, including meaning or faith orientations                                           | 3 |
|                                           | 28.  |                                                                                                                                               | 3 |
|                                           | 33.  | asking my patients about how they feel.                                                                                                       | 4 |
|                                           |      | being "out in the open" with the patient, even if I have no treatment or ailment for their disease.                                           | 3 |
|                                           | 40.  |                                                                                                                                               | 3 |
|                                           | 48.  | Love                                                                                                                                          | 3 |
|                                           | 49.  | Approval                                                                                                                                      | 3 |
|                                           | 50.  | transforming fear                                                                                                                             | 4 |
|                                           | 55.  | asking my colleagues how they feel                                                                                                            | 3 |
|                                           | 56.  | asking my colleagues how they make meaning of what's happening around them                                                                    | 3 |
|                                           | 64.  | Meeting the other as a human being                                                                                                            | 4 |
|                                           | 66.  | Acknowledge of the life situation of the client                                                                                               | 3 |
|                                           | 70.  | Awareness of relationships with all creation                                                                                                  | 2 |
|                                           | 73.  | Being inclusive and accepting of human difference                                                                                             | 3 |
|                                           | 77.  | An appreciation that all silences do not need to be filled immediately                                                                        | 3 |
|                                           | 91.  | Encouraging us to seek peace with ourselves, others and what lies beyond                                                                      | 4 |
|                                           | 117. | stepping into the patients place                                                                                                              | 3 |
|                                           | 139. | Helping to Induce hope                                                                                                                        | 3 |
|                                           | 140. | Helping to forgive                                                                                                                            | 3 |
|                                           | 141. | Helping to accept                                                                                                                             | 4 |
|                                           | 142. | Exploring the patient's needs                                                                                                                 | 4 |
|                                           | 160. | being inclusive rather than exclusive                                                                                                         | 3 |
|                                           | 178. | being attentive of patients' non-verbalized needs                                                                                             | 3 |
|                                           | 180. | Offering help yet respecting a refusal                                                                                                        | 3 |
|                                           | 183. | comforting my patients when they are afraid and sad                                                                                           | 3 |
|                                           | 185. | comforting the caregivers to my patient when they are afraid and sad                                                                          | 3 |
|                                           | 186. | Offering advice and help yet respecting a refusal                                                                                             | 3 |
|                                           | 187. | trying to understand and learn about any belief system my patients/their relatives/their caregivers may hold.                                 | 3 |
|                                           | 188. | Acknowledging and supporting the personal dignity of the client                                                                               | 3 |
|                                           | 189. | making time for listening to existential or religious thoughts                                                                                | 4 |
| Total n=35                                | 192. | Addressing and being respectful to patient values and beliefs                                                                                 | 4 |
| <b>6. Relationship</b>                    |      |                                                                                                                                               |   |
|                                           | 16.  | human equality between health professionals and patients                                                                                      | 3 |
|                                           | 18.  | being brave as a health professional                                                                                                          | 3 |
|                                           | 19.  | Sharing of your own self                                                                                                                      | 3 |
|                                           | 23.  | A certain spirit with which we engage in our work                                                                                             | 3 |

|            |      |                                                                                                                |   |
|------------|------|----------------------------------------------------------------------------------------------------------------|---|
|            | 24.  | Showing empathy                                                                                                | 3 |
|            | 26.  | Drawing on one's own spiritual resources to provide spiritual care                                             | 3 |
|            | 46.  | Tenderness                                                                                                     | 3 |
|            | 47.  | Understanding                                                                                                  | 3 |
|            | 51.  | holding the hands of a patient in need of a hand to hold.                                                      | 3 |
|            | 65.  | Allowing periods of silence in conversation                                                                    | 3 |
|            | 67.  | Being an important dimension in the meeting between professional and patient*                                  | 3 |
|            | 68.  | Being able to learn from the client                                                                            | 3 |
|            | 76.  | Being wholly present with the client                                                                           | 3 |
|            | 78.  | Relationships are characterized by honesty                                                                     | 3 |
|            | 79.  | Active listening to the client - demanding concentration as well as sensitivity and skill                      | 3 |
|            | 87.  | Always having a close introspective look at oneself i.e. witness approach                                      | 3 |
|            | 99.  | a curiosity about how thoughts about death influence overall health                                            | 3 |
|            | 100. | a curiosity about how perceptions of a good life influence overall health                                      | 3 |
|            | 102. | a curiosity about how religious practices can influence overall health                                         | 3 |
|            | 103. | a curiosity about how differences in views on existential questions can influence the delivery of health care  | 3 |
|            | 104. | a curiosity about how differences in views on existential questions can influence the reception of health care | 3 |
|            | 108. | Attention and presence                                                                                         | 3 |
|            | 109. | Sensitivity                                                                                                    | 3 |
|            | 113. | dealing with the patient's preferences                                                                         | 3 |
|            | 114. | integrating creativity and intentiveness in providing individualized care and treatments                       | 2 |
|            | 115. | being in doing                                                                                                 | 2 |
|            | 116. | Trust                                                                                                          | 3 |
|            | 120. | a field where professionals' boundaries should be respected, too*                                              | 3 |
|            | 130. | being open-minded, inclusive, listening - not indicating                                                       | 3 |
|            | 132. | Being present                                                                                                  | 3 |
|            | 133. | self-reflexivity                                                                                               | 3 |
|            | 134. | Curiosity                                                                                                      | 3 |
|            | 135. | Openness                                                                                                       | 3 |
|            | 136. | exploring the patient's resources                                                                              | 3 |
|            | 137. | Awareness of own vulnerability                                                                                 | 3 |
|            | 138. | Offering yourself as relational resource                                                                       | 3 |
|            | 143. | Exploring a patient's feelings of fullness                                                                     | 3 |
|            | 144. | Offering a relational home                                                                                     | 3 |
|            | 145. | Helping towards finding a home world                                                                           | 3 |
|            | 146. | Intersubjectivity                                                                                              | 3 |
|            | 147. | I-thou relationship                                                                                            | 3 |
|            | 159. | an openness to the importance of the individual worldview of patient and health professional                   | 4 |
|            | 165. | having the courage to being present in the midst of suffering                                                  | 3 |
|            | 166. | having to do with enabling the other to express his or her suffering                                           | 3 |
|            | 167. | deep listening and allowing silence                                                                            | 3 |
|            | 169. | relating to being able to sense the other                                                                      | 3 |
|            | 170. | improvisation and openness to what is                                                                          | 3 |
|            | 174. | Compassionate relationship                                                                                     | 3 |
| Total n=49 | 181. | Acknowledging and supporting the personal dignity of the client                                                | 3 |

\* ideas that were moved from one cluster to another based on consensus at the validation meeting.
